# Supplementary material
Source: PubMed Central journal article supplement (PMC6344891)
Supplement: DS_10.1177_0956797616658287.pdf [file DS_10.1177_0956797616658287.pdf]

Table S1.

## Indirect Effects Linking Childhood Adversity (CA) to Cortisol Parameters via Neuroticism and Depressed Affect in Study 1

| Cortisol Parameters           | Morning Cortisol       | CAR                     | Cortisol Slope           |
|-------------------------------|------------------------|-------------------------|--------------------------|
| CA (without Neuroticism)      | -0.0115 (0.0055)*      | -0.0015 (0.0048)        | 0.0003 (0.0005)          |
| Indirect effect 95% CI        | [-0.0001891, 0.001806] | [-0.001211, 0.0005252]  | [-0.0001357, 0.00004924] |
| CA (without Depressed Affect) | -0.0123 (0.0055)*      | -0.0013 (0.0048)        | 0.0003 (0.0005)          |
| Indirect effect 95% CI        | [-0.001462, 0.0007203] | [-0.0006547, 0.0007111] | [-0.00003543, 0.0001235] |

*Note:* CA was associated with both Neuroticism ( $\beta = .020$ ,  $SE = .006$ ,  $p = .002$ ) and Depressed Affect ( $\beta = .050$ ,  $SE = .018$ ,  $p = .006$ ). CAR: Cortisol Awakening Response. Regression coefficients for each additional mediator can be found on Table 2. 95% Confidence Intervals (CI) for indirect effects linking each CA to each cortisol parameter via each additional mediator. †  $p < .10$ , \*  $p < .05$ , \*\*  $p < .01$ .

Table S2.

## Indirect Effects Linking CA to Cortisol Parameters via Neuroticism and Depression in Study 2

| Cortisol Parameters      | Morning Cortisol        | CAR                    | Cortisol Slope           |
|--------------------------|-------------------------|------------------------|--------------------------|
| CA (without Neuroticism) | -0.0094 (0.0045)†       | -0.0053 (0.0048)       | 0.0000 (0.0004)          |
| Indirect effect 95% CI   | [-0.0008874, 0.0006692] | [-0.001194, 0.0003979] | [-0.0001164, 0.00003037] |
| CA (without Depression)  | -0.0095 (0.0045)†       | 0.0049 (0.0048)        | 0.0000 (0.0004)          |
| Indirect effect 95% CI   | [-0.002071, 0.001617]   | [-0.002774, 0.0009366] | [-0.001564, 0.0001791]   |

*Note:* CA was associated with Depression ( $\beta = .550$ ,  $SE = .108$ ,  $p < .001$ ), but not Neuroticism ( $\beta = .032$ ,  $SE = .021$ ,  $p = .124$ ). CAR: Cortisol Awakening Response. Regression coefficients for each additional mediator can be found on Table 5. 95% Confidence Intervals (CI) for indirect effects linking each CA to each cortisol parameter via each additional mediator. †  $p < .10$ , \*  $p < .05$ , \*\*  $p < .01$ .
