# Supplementary material
Source: PubMed Central journal article supplement (PMC6344891)
Supplement: Zilioli_Revised_Supplemental_Material.pdf [file Zilioli_Revised_Supplemental_Material.pdf]

**Table S1*****Indirect effects linking CA to cortisol parameters via neuroticism and depressed affect in Study 1.***

| Cortisol Parameters           | Morning Cortisol       | CAR                     | Cortisol Slope           |
|-------------------------------|------------------------|-------------------------|--------------------------|
| CA (without Neuroticism)      | -0.0115 (0.0055)*      | -0.0015 (0.0048)        | 0.0003 (0.0005)          |
| Indirect effect 95% CI        | [-0.0001891, 0.001806] | [-0.001211, 0.0005252]  | [-0.0001357, 0.00004924] |
| CA (without Depressed Affect) | -0.0123 (0.0055)*      | -0.0013 (0.0048)        | 0.0003 (0.0005)          |
| Indirect effect 95% CI        | [-0.001462, 0.0007203] | [-0.0006547, 0.0007111] | [-0.00003543, 0.0001235] |

*Note:* CA was associated with both Neuroticism ( $b = .020$ ,  $SE = .006$ ,  $p = .002$ ) and Depressed Affect ( $b = .050$ ,  $SE = .018$ ,  $p = .006$ ). CA: Childhood Adversity, CAR: Cortisol Awakening Response. Regression coefficients for each additional mediator can be found on Table 2. 95% Confidence Intervals (CI) for indirect effects linking each CA to each cortisol parameter via each additional mediator. †  $p < .10$ , \*  $p < .05$ , \*\*  $p < .01$ .

**Table S2*****Indirect effects linking CA to cortisol parameters via neuroticism items and depression in Study 2.***

| Cortisol Parameters                   | Morning Cortisol      | CAR                   | Cortisol Slope        |
|---------------------------------------|-----------------------|-----------------------|-----------------------|
| CA (without Anxious, Easily Upset)    | -0.0094 (0.0045)*     | 0.0054 (0.0048)       | 0.0000 (0.0004)       |
| Indirect effect 95% CI                | [-0.000708, 0.000540] | [-0.000961, 0.000462] | [-0.000098, 0.000029] |
| CA (without Calm, Emotionally Stable) | -0.0093 (0.0045)*     | 0.0055 (0.0048)       | 0.0000 (0.0004)       |
| Indirect effect 95% CI                | [-0.000462, 0.000662] | [-0.000790, 0.000434] | [-0.000062, 0.000040] |
| CA (without Depression)               | -0.0096 (0.0045)*     | 0.0050 (0.0048)       | 0.0000 (0.0004)       |
| Indirect effect 95% CI                | [-0.002110, 0.001605] | [-0.002747, 0.001052] | [-0.000158, 0.000167] |

*Note:* CA was associated with Depression ( $b = .544$ ,  $SE = .106$ ,  $p < .001$ ), but not Anxious, Easily Upset ( $b = -.039$ ,  $SE = .027$ ,  $p = .157$ ) or Calm, Emotionally Stable ( $b = .031$ ,  $SE = .025$ ,  $p = .209$ ). CA: Childhood Adversity, CAR: Cortisol Awakening Response. Regression coefficients for each additional mediator can be found on Table 5. 95% Confidence Intervals (CI) for indirect effects linking each CA to each cortisol parameter via each additional mediator. †  $p < .10$ , \*  $p < .05$ , \*\*  $p < .01$ .
